# Supplementary material
Source: PubMed Central journal article supplement (PMC3204792)
Supplement: NIHMS324500-supplement-Supp_Figure_S1-S4__Table_S1-S2.pdf [file NIHMS324500-supplement-Supp_Figure_S1-S4__Table_S1-S2.pdf]

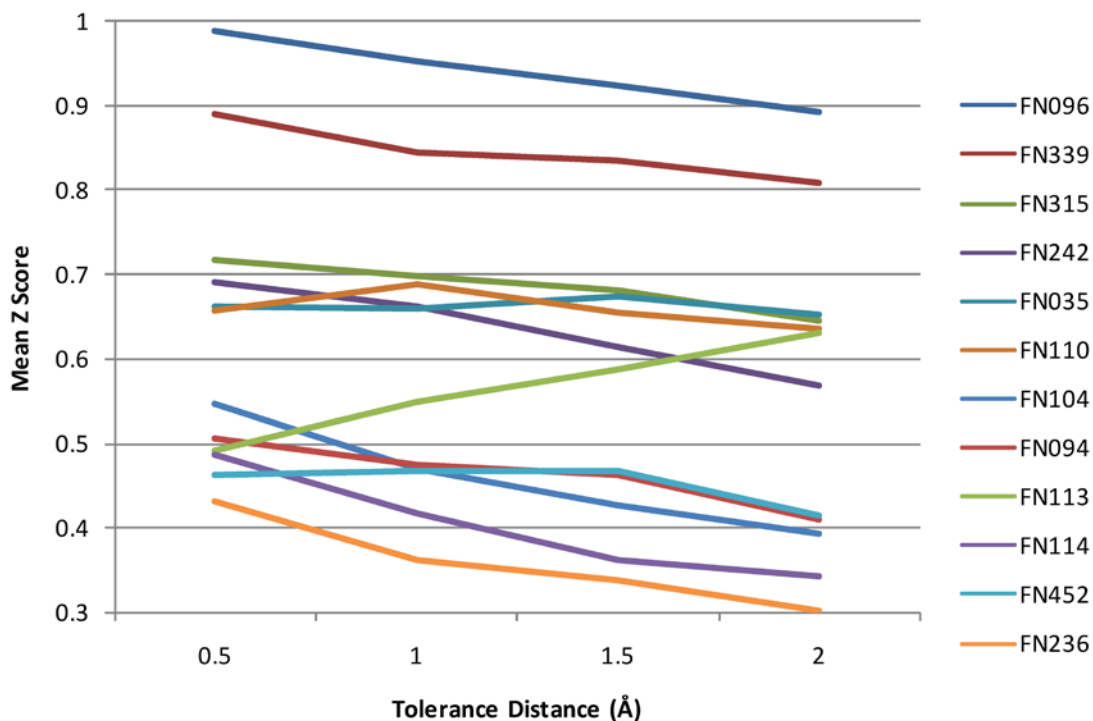

**Fig. S1 Influence of different binding site definitions on the prediction performance of the top 12 predictors.** Mean Z score are shown for different tolerance distance used for binding site definition. All residues with a least one atom within the sum of the van der Waals radius plus the tolerance distance were considered to belong to the binding site.

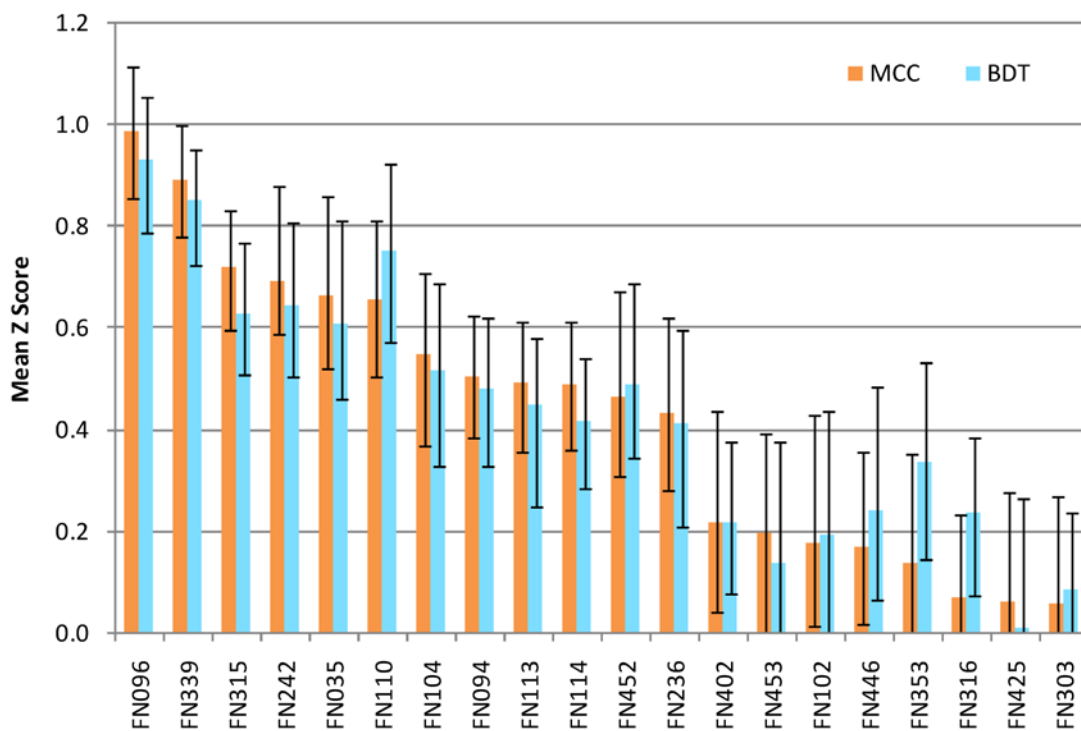

**Fig. S2 Comparison between the overall prediction performance evaluated using the Mathews Correlation Coefficient (MCC, in orange) and the Binding site Distance Test (BDT, in cyan). Overall prediction performance is shown in mean Z Scores over all targets.**

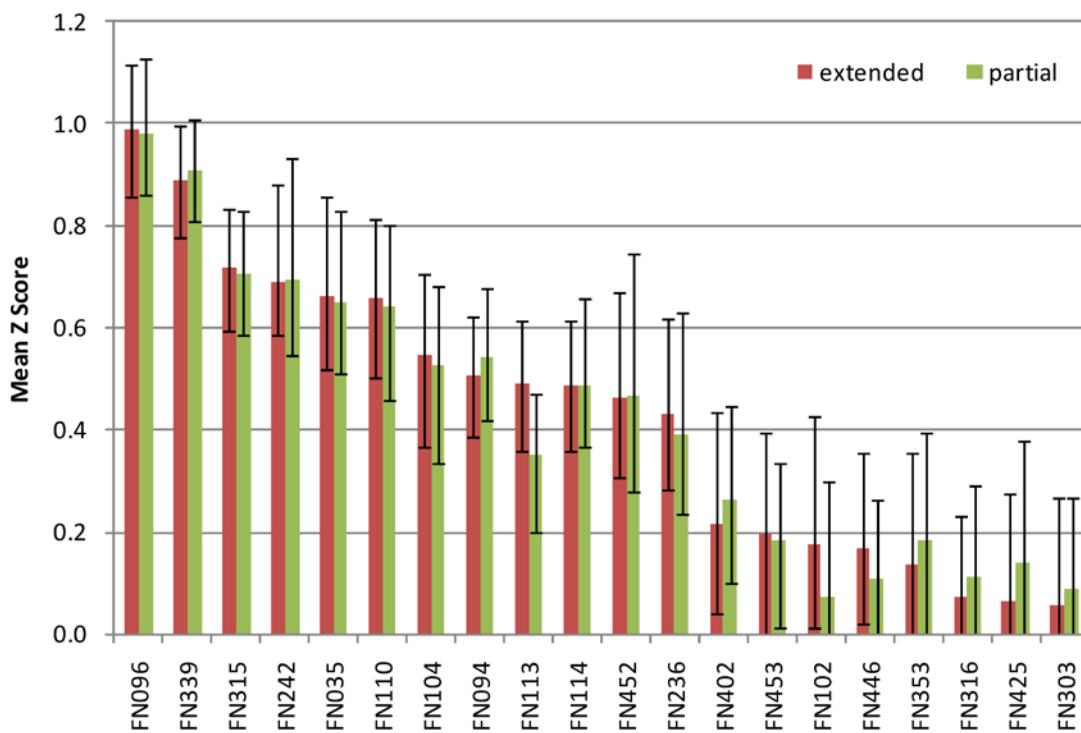

**Fig. S3 Comparison of the overall prediction performance observed with the extended (red) and the partial (green) binding site definitions.** Overall prediction performance is shown in mean Z Scores over all targets.

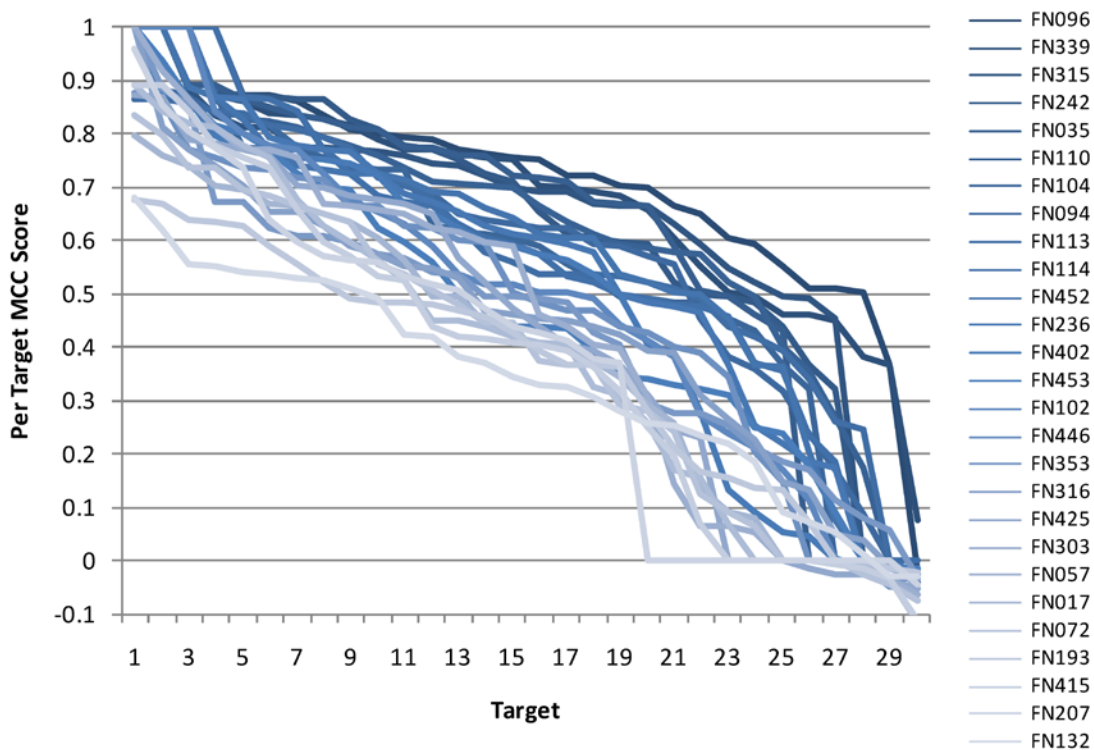

**Fig. S4 MCC scores for all groups with at least 10 predictions for all targets. Targets were sorted by their respective MCC score, individually for each group.**

**Table S1 Definition of binding site residues used in the assessment.** [a] PDB id for the deposited target structure which was used to define the partial binding site. [b] PDB id of the protein structure related to the target structure, used in addition to define the extended binding site.

| Target | Target PDB id <sup>[a]</sup> | Related PDB id <sup>[b]</sup> | Partial Binding Site                                                               | Extended Binding Site                                                              | Neutral Residues                         |
|--------|------------------------------|-------------------------------|------------------------------------------------------------------------------------|------------------------------------------------------------------------------------|------------------------------------------|
| T0515  | 3MT1                         | 1TWI                          | 198, 199, 232, 233, 324                                                            | 35, 37, 162, 198, 199, 230, 232, 233, 269, 273, 324, 328                           | 35, 37, 162, 230, 269, 273, 328          |
| T0516  | 3NO6                         | 2QCX                          | 44, 47, 48, 51, 113, 137, 141, 208, 211                                            | 44, 47, 48, 51, 113, 137, 138, 141, 167, 171, 174, 208, 211                        | 138, 167, 171, 174                       |
| T0518  | 3NMB                         |                               | 132, 133, 134, 162, 164, 271, 273                                                  | 132, 133, 134, 162, 164, 271, 273                                                  |                                          |
| T0521  | 3MSE                         |                               | 48, 50, 52, 54, 59, 117, 121, 123, 128                                             | 48, 50, 52, 54, 59, 117, 121, 123, 128                                             |                                          |
| T0524  | 3MWX                         | 1SOO                          | 73, 74, 177, 203, 230, 269, 271, 283                                               | 62, 63, 73, 74, 100, 101, 177, 203, 230, 269, 271, 283, 285                        | 62, 63, 100, 101, 285                    |
| T0526  | 3NRE                         | 1NSO                          | 56, 83, 148, 173, 200, 241, 253                                                    | 43, 56, 77, 83, 148, 173, 200, 241, 253                                            | 43, 77                                   |
| T0529  | 3MWT                         |                               | 389, 390, 391, 533                                                                 | 389, 390, 391, 533                                                                 |                                          |
| T0539  | 2LOB                         |                               | 33, 36, 51, 53, 56, 59, 70, 73                                                     | 33, 36, 51, 53, 56, 59, 70, 73                                                     |                                          |
| T0547  | 3NZP                         | 1TWI                          | 84, 86, 87, 132, 231, 233, 236, 273, 274, 320, 321, 322, 323, 483, 519             | 84, 86, 87, 132, 231, 233, 236, 273, 274, 320, 321, 322, 323, 452, 483, 484, 519   | 452, 484                                 |
| T0548  | 3NNQ                         |                               | 58, 62, 95, 98                                                                     | 58, 62, 95, 98                                                                     |                                          |
| T0565  | 3NPF                         | 3H41                          | 191, 193, 202, 203, 262, 263                                                       | 54, 80, 191, 193, 194, 202, 203, 204, 221, 222, 262, 263                           | 54, 80, 194, 204, 221, 222               |
| T0570  | 3NO3                         |                               | 30, 59, 61, 123, 156, 158, 178, 222                                                | 30, 59, 61, 123, 156, 158, 178, 222                                                |                                          |
| T0582  | 3O14                         |                               | 58, 60, 64, 94                                                                     | 58, 60, 64, 94                                                                     |                                          |
| T0584  | 3NF2                         | 1RQI                          | 55, 58, 87, 104                                                                    | 55, 58, 87, 90, 91, 94, 103, 104, 155, 183, 184, 221, 248                          | 90, 91, 94, 103, 155, 183, 184, 221, 248 |
| T0585  | 3NE8                         |                               | 13, 28, 82, 84, 115                                                                | 13, 28, 82, 84, 115                                                                |                                          |
| T0591  | 3NRA                         |                               | 109, 110, 111, 135, 185, 189, 217, 219, 251, 252, 260, 283                         | 109, 110, 111, 135, 185, 189, 217, 219, 251, 252, 260, 283                         |                                          |
| T0597  | 3NIE                         |                               | 36, 37, 38, 39, 40, 41, 42, 44, 57, 59, 73, 112, 114, 117, 120, 158, 160, 163, 174 | 36, 37, 38, 39, 40, 41, 42, 44, 57, 59, 73, 112, 114, 117, 120, 158, 160, 163, 174 |                                          |

|              |      |      |                                                                                                                                                                     |                                                                                                                                                                     |                                                  |
|--------------|------|------|---------------------------------------------------------------------------------------------------------------------------------------------------------------------|---------------------------------------------------------------------------------------------------------------------------------------------------------------------|--------------------------------------------------|
| <b>T0599</b> | 3OS6 | 3HWO | 213, 214, 215, 364, 377, 381                                                                                                                                        | 212, 213, 214, 215, 276, 304, 328, 347, 348, 362, 364, 377, 381                                                                                                     | 212, 276, 304, 328, 347, 348, 362                |
| <b>T0604</b> | 3NLC |      | 113, 114, 116, 117, 118, 137, 138, 166, 167, 170, 171, 172, 174, 175, 177, 178, 180, 241, 242, 243, 272, 273, 274, 277, 280, 352, 364, 365, 515, 516, 523, 524, 527 | 113, 114, 116, 117, 118, 137, 138, 166, 167, 170, 171, 172, 174, 175, 177, 178, 180, 241, 242, 243, 272, 273, 274, 277, 280, 352, 364, 365, 515, 516, 523, 524, 527 |                                                  |
| <b>T0607</b> | 3PFE | 2ZOF | 96, 129, 163, 190, 442                                                                                                                                              | 96, 129, 162, 163, 165, 190, 191, 205, 340, 410, 412, 413, 414, 442                                                                                                 | 162, 165, 191, 205, 340, 410, 412, 413, 414      |
| <b>T0609</b> | 3OS7 | 1Z45 | 67, 69, 108, 184, 288                                                                                                                                               | 67, 69, 80, 81, 108, 184, 245, 286, 288, 300                                                                                                                        | 80, 81, 245, 286, 300                            |
| <b>T0613</b> | 3OBI | 1C2T | 177, 178, 225, 229, 230                                                                                                                                             | 173, 174, 175, 176, 177, 178, 183, 192, 193, 194, 223, 225, 226, 229, 230                                                                                           | 173, 174, 175, 176, 183, 192, 193, 194, 223, 226 |
| <b>T0615</b> | 3NQW | 1VJ7 | 33, 36, 62, 63, 98, 102, 123, 127, 139, 147                                                                                                                         | 26, 33, 36, 62, 63, 98, 102, 123, 127, 128, 130, 131, 139, 143, 147                                                                                                 | 26, 128, 130, 131, 143                           |
| <b>T0622</b> | 3NKL | 2VT2 | 10, 11, 12, 72                                                                                                                                                      | 7, 9, 10, 11, 12, 33, 34, 35, 38, 69, 70, 71, 72, 77, 81                                                                                                            | 7, 9, 33, 34, 35, 38, 69, 70, 71, 77, 81         |
| <b>T0625</b> | 3ORU |      | 126, 143, 207                                                                                                                                                       | 126, 143, 207                                                                                                                                                       |                                                  |
| <b>T0629</b> | 2XGF |      | 73, 75, 105, 107, 119, 121, 156, 158, 170, 172, 179, 181, 188, 190                                                                                                  | 73, 75, 105, 107, 119, 121, 156, 158, 170, 172, 179, 181, 188, 190                                                                                                  |                                                  |
| <b>T0632</b> | 3NWZ |      | 76, 83, 109, 110, 117, 118, 119, 120, 134, 136, 137, 138, 139, 164, 166, 167                                                                                        | 76, 83, 109, 110, 117, 118, 119, 120, 134, 136, 137, 138, 139, 164, 166, 167                                                                                        |                                                  |
| <b>T0635</b> | 3N1U |      | 25, 27, 118                                                                                                                                                         | 25, 27, 118                                                                                                                                                         |                                                  |
| <b>T0636</b> | 3P1T | 1GEX | 22, 47, 145, 172, 197, 301, 306, 313                                                                                                                                | 22, 47, 75, 76, 145, 169, 171, 172, 194, 196, 197, 205, 206, 225, 301, 306, 313                                                                                     | 75, 76, 169, 171, 194, 196, 205, 206, 225        |
| <b>T0641</b> | 3NYI |      | 30, 65, 66, 67, 96, 97, 127, 128, 129, 164, 166, 179, 204, 241, 272, 275, 279, 286                                                                                  | 30, 65, 66, 67, 96, 97, 127, 128, 129, 164, 166, 179, 204, 241, 272, 275, 279, 286                                                                                  |                                                  |

**Table SII P-values computed by Wilcoxon Signed-Rank Test of all against all predictors.** Significant differences between two groups are indicated by cells with white background. For clarity, only the 12 top performing predictors are shown, sorted by their overall performance.

|       | FN096 | FN339 | FN315 | FN242 | FN035 | FN110 | FN104 | FN094 | FN113 | FN114 | FN452 | FN236 |
|-------|-------|-------|-------|-------|-------|-------|-------|-------|-------|-------|-------|-------|
| FN096 | -     | 0.11  | 0.01  | 0.16  | 0.14  | 0.00  | 0.01  | 0.00  | 0.00  | 0.01  | 0.00  | 0.00  |
| FN339 | 0.11  | -     | 0.26  | 0.27  | 0.49  | 0.12  | 0.06  | 0.04  | 0.02  | 0.06  | 0.01  | 0.02  |
| FN315 | 0.01  | 0.26  | -     | 0.76  | 0.23  | 0.79  | 0.39  | 0.10  | 0.05  | 0.18  | 0.16  | 0.09  |
| FN242 | 0.16  | 0.27  | 0.76  | -     | 0.91  | 0.46  | 0.23  | 0.12  | 0.21  | 0.21  | 0.05  | 0.08  |
| FN035 | 0.14  | 0.49  | 0.23  | 0.91  | -     | 0.92  | 0.39  | 0.10  | 0.10  | 0.18  | 0.18  | 0.17  |
| FN110 | 0.00  | 0.12  | 0.79  | 0.46  | 0.92  | -     | 0.52  | 0.24  | 0.13  | 0.50  | 0.41  | 0.29  |
| FN104 | 0.01  | 0.06  | 0.39  | 0.23  | 0.39  | 0.52  | -     | 0.78  | 0.71  | 0.37  | 0.73  | 0.50  |
| FN094 | 0.00  | 0.04  | 0.10  | 0.12  | 0.10  | 0.24  | 0.78  | -     | 0.68  | 0.94  | 0.67  | 0.72  |
| FN113 | 0.00  | 0.02  | 0.05  | 0.21  | 0.10  | 0.13  | 0.71  | 0.68  | -     | 0.87  | 0.95  | 0.64  |
| FN114 | 0.01  | 0.06  | 0.18  | 0.21  | 0.18  | 0.50  | 0.37  | 0.94  | 0.87  | -     | 0.83  | 0.49  |
| FN452 | 0.00  | 0.01  | 0.16  | 0.05  | 0.18  | 0.41  | 0.73  | 0.67  | 0.95  | 0.83  | -     | 0.87  |
| FN236 | 0.00  | 0.02  | 0.09  | 0.08  | 0.17  | 0.29  | 0.50  | 0.72  | 0.64  | 0.49  | 0.87  | -     |
